# Supplementary material for: Migraine aura-like symptoms at onset of stroke and stroke-like symptoms in migraine with aura
Source: PubMed Central journal article supplement (PMC9531679; doi:10.3389/fneur.2022.1004058), 2022-09-14
Supplement: Data_Sheet_1.pdf [file Data_Sheet_1.pdf]

ID

---

## Questionnaire

*If Stroke-Wake-Up?*  yes  no

**1) Have you had any visual disturbances?**  yes  no. *If yes,*

**a) Type of visual disturbance?**

blurred  bright  colored  dark/black  zigzag lines  scintillating scotoma  other

---

---

**b) Localization:**  monocular  binocular homonymous  binocular on totality of visual field

**c) Migration of visual disturbances?**  yes  no (were fixed). If yes, please select:

from center to periphery

if checked:  to the left  to the right  upwards  downwards

From the periphery to the center

if checked:  from above  from below  from the right  from the left

---

---

**e) Time of onset**

suddenly  < 59 seconds  60sec-4 minutes 59 seconds  5-59minutes  60 minutes-24h  >24h  unclear

**f) Duration of the visual disturbance (beginning to end)**

< 59 seconds  60sec-4 minutes 59 seconds  5-59minutes  60 minutes-24h  >24h  unclear

**2) Have you had any sensory disturbances?** yes no.

**a) Type of sensory disturbance?** tingling/pins and needles numbness  other

---

---

**b) If yes, where were they located?** (please select)

left -  right -  both sides

tongue -  face -  arm -  leg  torso

**c) Have they migrated?** yes no

If yes, please specify order (tongue, face, arm, leg, trunk)

---

---

**d) Time of onset**

suddenly  < 59 seconds 60sec-4 minutes 59 seconds 5-59minutes 60 minutes-24h >24h  unclear

**e) Duration of the sensory disturbance (beginning to end)**

< 59 seconds 60sec-4 minutes 59 seconds 5-59minutes 60 minutes-24h >24h  unclear

**3) Have you had any weakness?** yes no. **If yes,**

**a) where were they located? (please choose)**

left -  right -  both sides

tongue -  face -  arm -  leg - torso

**b) Have they migrated?** yes no

If yes, please specify order (tongue, face, arm, leg, trunk)

---

---

---

---

**c) Time of onset**

suddenly  < 59 seconds  60sec-4 minutes 59 seconds  5-59minutes  60 minutes-24h  >24h  unclear

**d) Duration of the motor disturbance (beginning to end)**

< 59 seconds  60sec-4 minutes 59 seconds  5-59minutes  60 minutes-24h  >24h  unclear

**4) Have you had difficulty speaking?  yes  no.**

If yes

**a) of what kind? (please choose)**

difficulty finding the right words  difficulty understanding what others have said  difficulty articulating the words  unfamiliar words spoken  neologisms  others

---

---

**b) Time of onset**

suddenly  < 59 seconds  60sec-4 minutes 59 seconds  5-59minutes  60 minutes-24h  >24h  unclear

**c) Duration of the speech disturbance (beginning to end)**

< 59 seconds  60sec-4 minutes 59 seconds  5-59minutes  60 minutes-24h  >24h  unclear

**5) a) What was the order of: Visual disturbances, speech disturbances, sensory disturbances, and weakness? Please describe:**

---

---

---

**b) Time interval between symptoms? Eg, Sensory->Weakness->Visual disturbance**

Symptom 1 \_\_\_\_\_ after \_\_\_\_\_ minutes

Symptom 2 \_\_\_\_\_ after \_\_\_\_\_ minutes

Symptom 3 \_\_\_\_\_ after \_\_\_\_\_ minutes

Symptom 4 \_\_\_\_\_ after \_\_\_\_\_ minutes

Symptom 5 \_\_\_\_\_ after \_\_\_\_\_ minutes

**6) How many episodes with the symptoms described above have you had so far?**

---

*when did the last episode occur?*

---

**7) Have you experienced a headache after or at the same time as the symptoms described above?**

*If yes*

- Did the symptoms occur  before  after, or  during the headache?

- where was the headache located? \_\_\_\_\_

- Character  pulsating pain  throbbing pain  shooting pain  pressing pain  burning

- how long did it last? \_\_\_\_\_

- how severe was the pain? (1-10/10) \_\_\_\_\_

- Was the pain related to physical activity?  Yes  No

*if yes*  the pain decreased  the pain increased

- during the headache you had  nausea,  photophobia,  phonophobia

**8) Have you had trouble concentrating?  yes  no.**

If so,

**Duration (beginning to end)**

< 59 seconds  60sec-4 minutes  59 seconds  5-59minutes  60 minutes-24h  >24h  unclear

**9) Were you been disoriented?** yes no

If so,

**Duration of disorientation (onset to end)**

< 59 seconds 60sec-4 minutes 59 seconds 5-59minutes 60 minutes-24h >24h  unclear

**10) Have you had trouble swallowing?** yes no

If yes

**Duration of difficulty swallowing (beginning to end)**

< 59 seconds 60sec-4 minutes 59 seconds 5-59minutes 60 minutes-24h >24h  unclear

**11) Have you had difficulty walking?** yes no:

If so,

**a) Time of onset**

suddenly  < 59 seconds 60sec-4 minutes 59 seconds 5-59minutes 60 minutes-24h >24h  unclear

**b) Duration of the difficulty walking (beginning to end)**

< 59 seconds 60sec-4 minutes 59 seconds 5-59minutes 60 minutes-24h >24h  unclear

**12) Have you experienced trouble coordination in your arms (e.g., when spreading butter on bread) or legs (e.g., when walking)?** yes no.

If so,

**a) where have you felt it?**

left -  right -  both sides

Tongue -  Face -  Arm -  Leg - Torso

**a) Time of onset**

suddenly  < 59 seconds 60sec-4 minutes 59 seconds 5-59minutes 60 minutes-24h >24h  unclear

**b) Duration of the coordination disturbance (beginning to end)**

< 59 seconds 60sec-4 minutes 59 seconds 5-59minutes 60 minutes-24h >24h  unclear

**13) Have you had vertigo?** yes no

If so,

**a) was this**

rotatory to the right  rotatory to the left  swaying

**b) Time of onset**

suddenly  < 59 seconds 60sec-4 minutes 59 seconds 5-59minutes 60 minutes-24h >24h  unclear

**c) Duration of the vertigo (beginning to end)**

< 59 seconds 60sec-4 minutes and 59 seconds 5-59minutes 60 minutes-24h >24h  unclear

**14) Have you had double vision?** yes no

...If so,

**a) were they** horizontal vertical  oblique offset? (please choose)

**b) Time of onset**

suddenly  < 59 seconds 60sec-4 minutes 59 seconds 5-59minutes 60 minutes-24h >24h  unclear

**c) Duration of the double vision(beginning to end)**

< 59 seconds 60sec-4 minutes 59 seconds 5-59minutes 60 minutes-24h >24h  unclear

**15) Have you had a hearing disturbance? yes no**

If so,

**a) Time of propagation**

< 59 seconds  60sec-4 minutes  59 seconds  5-59minutes  60 minutes-24h  >24h  unclear

**b) Duration of the hearing disturbance (beginning to end)**

< 59 seconds  60sec-4 minutes  59 seconds  5-59minutes  60 minutes-24h  >24h  unclear

**16) Cardiovascular risk factors**

- a. Do you smoke? If yes \_\_\_\_PY
- b. Do you drink alcohol? If yes \_\_\_\_\_Drinks/month
- c. Do you take drugs?
- d. Have you been diagnosed with high blood pressure? yes no
- e. Have you been diagnosed with diabetes mellitus? yes no
- f. Do you have a family history of stroke and/or heart attack? yes no. If yes, at what age did these occur? \_\_\_\_
- g. Do you have high cholesterol? yes no
- h. Have you been diagnosed with sleep apnea? yes no unknown
- i. How much do you weigh and how tall are you? \_\_\_kg\_\_\_cm
- j. Have you been diagnosed with depression? yes no
- k. (for women) are you taking birth control pills? yes no
- l. Have you been diagnosed with renal insufficiency? yes no
- m. Have you been diagnosed with atrial fibrillation yes no, or other cardiac arrhythmias? If yes, which ones? \_\_\_\_\_
- n. Have you been diagnosed with a chronic inflammatory disease?  yes  no

**17) Varia**

Have you been diagnosed with: peripheral arterial disease , coronary heart disease
